# Supplementary material
Source: ML conference proceedings conference paper supplement (https://proceedings.neurips.cc/paper_files/paper/2019/hash/7634ea65a4e6d9041cfd3f7de18e334a-Abstract.html)
Supplement: Supplementary file [file 7634ea65a4e6d9041cfd3f7de18e334a-Supplemental.zip]

---

# Supplement

---

Anonymous Author(s)  
 Affiliation  
 Address  
 email

## 1 Marginal likelihood derivation

To extend to multivariate observations  $Y = \{y^{(1)}, \dots, y^{(D)}\}$  where  $y^{(d)}$  denotes the observations of the  $d$ th variable (e.g., a feature dimension of EEG recording, a census tract's crime occurrence), By exploiting the conditional independence of  $Y$ , the marginal likelihood for the multivariate observations is:

$$\begin{aligned}
 p(Y|Z, \sigma^2) &= \int \prod_{d=1}^D p(y^{(d)}|\mathbf{g}, Z, \sigma^2) p(\mathbf{g}|C) d\mathbf{g} \\
 &= \int \prod_{d=1}^D N(y^{(d)}|Z\mathbf{g}, \Sigma_{y|g}) N(\mathbf{g}|0, \Sigma_g) d\mathbf{g} \\
 &= \int N(\mathbf{g}|0, \Sigma_g) \prod_d (|2\pi\Sigma_{y|g}|^{-\frac{1}{2}} \exp[-\frac{1}{2}(y^{(d)} - Z\mathbf{g})^T \Sigma_{y|g}^{-1} (y^{(d)} - Z\mathbf{g})]) d\mathbf{g} \\
 &= \int N(\mathbf{g}|0, \Sigma_g) |2\pi\Sigma_{y|g}|^{-\frac{D}{2}} \exp[-\frac{1}{2} \sum_d (y^{(d)} - Z\mathbf{g})^T \Sigma_{y|g}^{-1} (y^{(d)} - Z\mathbf{g})] d\mathbf{g} \\
 &= \int N(\mathbf{g}|0, \Sigma_g) |2\pi\Sigma_{y|g}|^{-\frac{D}{2}} \exp[-\frac{1}{2} (Z\mathbf{g} - \bar{y})^T (\frac{\Sigma_{y|g}}{D})^{-1} (Z\mathbf{g} - \bar{y}) - \frac{1}{2} \sum_d (y^{(d)} - \bar{y})^T \Sigma_{y|g}^{-1} (y^{(d)} - \bar{y})] d\mathbf{g} \\
 &= \int N(\mathbf{g}|0, \Sigma_g) |2\pi\Sigma_{y|g}|^{-\frac{D}{2}} \exp[-\frac{1}{2} (Z\mathbf{g} - \bar{y})^T (\frac{\Sigma_{y|g}}{D})^{-1} (Z\mathbf{g} - \bar{y})] \exp[-\frac{1}{2} \sum_d (y^{(d)} - \bar{y})^T \Sigma_{y|g}^{-1} (y^{(d)} - \bar{y})] d\mathbf{g} \\
 &= \int N(\mathbf{g}|0, \Sigma_g) |2\pi\Sigma_{y|g}|^{-\frac{D}{2}} |2\pi\frac{\Sigma_{y|g}}{J}|^{\frac{1}{2}} N(Z\mathbf{g}; \bar{y}, \frac{\Sigma_{y|g}}{D}) \exp[-\frac{1}{2} \sum_d (y^{(d)} - \bar{y})^T \Sigma_{y|g}^{-1} (y^{(d)} - \bar{y})] d\mathbf{g} \\
 &= \int N(\mathbf{g}|0, \Sigma_g) \frac{|2\pi\frac{\Sigma_{y|g}}{D}|^{\frac{1}{2}}}{|2\pi\Sigma_{y|g}|^{\frac{D}{2}}} N(Z\mathbf{g}; \bar{y}, \frac{\Sigma_{y|g}}{D}) \exp[-\frac{1}{2} \text{tr}(\sum_d (y^{(d)} - \bar{y})^T \Sigma_{y|g}^{-1} (y^{(d)} - \bar{y}))] d\mathbf{g} \\
 &= \frac{|2\pi\frac{\Sigma_{y|g}}{D}|^{\frac{1}{2}}}{|2\pi\Sigma_{y|g}|^{\frac{D}{2}}} \exp[-\frac{1}{2} \text{tr}(\sum_d (y^{(d)} - \bar{y})(y^{(d)} - \bar{y})^T \Sigma_{y|g}^{-1})] \int N(\bar{y}; Z\mathbf{g}, \frac{\Sigma_{y|g}}{N}) N(\mathbf{g}; 0, \Sigma_g) d\mathbf{g} \\
 &= \frac{|2\pi\frac{\Sigma_{y|g}}{D}|^{\frac{1}{2}}}{|2\pi\Sigma_{y|g}|^{\frac{D}{2}}} \exp[-\frac{1}{2} \text{tr}(\sum_d (y^{(d)} - \bar{y})(y^{(d)} - \bar{y})^T \Sigma_{y|g}^{-1})] N(\bar{y}; 0, \frac{\Sigma_{y|g}}{D} + Z\Sigma_g Z^T)
 \end{aligned} \tag{1}$$

where  $\bar{y} = \frac{\sum_d y^{(d)}}{D}$ .

## 7 2 Efficient inference

8 The posterior distribution of  $\mathbf{f}^{(d)}$  as

$$\begin{aligned}
& p(\mathbf{f}^{(d)} | y^{(d)}, \mathbf{f}^{(-d)}, Z, \sigma^2) \\
& \propto p(y^{(d)} | \mathbf{f}^{(d)}, \sigma^2) p(\mathbf{f}^{(d)} | \mathbf{f}^{(-d)}, Z) \\
& = N(y^{(d)} | \mathbf{f}^{(d)}, \sigma^2 I) N(\mathbf{f}^{(d)} | Z \mu_{g|f^{(-d)}}, \Sigma_f + Z \Sigma_{g|f^{(-d)}} Z^T) \\
& = N(\mathbf{f}^{(d)} | \mu_{f^{(d)}|f^{(-d)}}, \Sigma_{f^{(d)}|f^{(-d)}}) \\
& \Sigma_{f^{(d)}|f^{(-d)}}^{-1} = (\Sigma_f + Z \Sigma_{g|f^{(-d)}} Z^T)^{-1} + (\sigma^2 I)^{-1} \\
& \mu_{f^{(d)}|f^{(-d)}} = \Sigma_{f^{(d)}|f^{(-d)}} [(\sigma^2 I)^{-1} y^{(d)} + (\Sigma_f + Z \Sigma_{g|f^{(-d)}} Z^T)^{-1} Z \mu_{g|f^{(-d)}}]
\end{aligned} \tag{2}$$

## 9 3 Estimating the kernel parameters

10 To estimate the hyper-parameters of the kernels, we adopt the empirical Bayes approach for continuous  
11 optimization methods. In particular, we maximize the marginal likelihood by marginalizing out the  
12 latent function  $f$ . This moves us up one level of the Bayesian hierarchy, and reduces the chances  
13 of overfitting, since the number of kernel parameters is fairly small in our setting.  $Z$  specifies the  
14 covariance structure in terms of the combinations of  $\kappa_g$  and  $\kappa_f$ . Both of the kernel functions are  
15 parametrized by the hyperparameters  $\{l_g, \sigma_g^2, \sigma_f^2\}$ . We thus illustrate our method on a more general  
16 form of  $p(Y|Z, \sigma^2)$ :

17 The exponential term of Eqn. (1)  $-\frac{1}{2} \bar{y}^T (\frac{\Sigma_{y|g}}{D} + Z \Sigma_g Z^T) \bar{y}$  measures how well the model fits the data,  
18 the normalizing constant term  $\log |2\pi \frac{\Sigma_{y|g}}{D}|^{\frac{1}{2}} - \log |2\pi \Sigma_{y|g}|^{\frac{D}{2}}$  measures model complexity, and the  
19 third one is just a constant. The tradeoff between the first two terms provides us a simpler model  
20 fitting the data well. In 1d case of a SE kernel, as the length scale  $\ell$  varies and hold  $\sigma_y^2$  fixed. For short  
21 length scales, the fit will be good, so  $-\frac{1}{2} \bar{y}^T (\frac{\Sigma_{y|g}}{D} + Z \Sigma_g Z^T) \bar{y}$  will be small. However, the model  
22 complexity will be high:  $K$  will be almost diagonal and most points will not be considered ‘‘near’’ any  
23 others, so the  $\log |2\pi \frac{\Sigma_{y|g}}{D}|^{\frac{1}{2}} - \log |2\pi \Sigma_{y|g}|^{\frac{D}{2}}$  will be large. For long length scales, the fit will be poor  
24 but the model complexity will be low:  $K$  will be almost all 1’s, so  $\log |2\pi \frac{\Sigma_{y|g}}{D}|^{\frac{1}{2}} - \log |2\pi \Sigma_{y|g}|^{\frac{D}{2}}$   
25 will be small.

26 To maximize the marginal likelihood, let the hyper-parameters be denoted by  $\theta = \{l_g, \sigma_g^2, \sigma_f^2\}$ . By  
27 defining  $K_y = \frac{\Sigma_{y|g}}{D} + Z \Sigma_g Z^T$ , we can show that

$$\begin{aligned}
\frac{\partial}{\partial \theta_j} \log p(y|X) &= \frac{1}{2} y^T K_y^{-1} \frac{\partial K_y}{\partial \theta_j} K_y^{-1} y - \frac{1}{2} \text{tr}(K_y^{-1} \frac{\partial K_y}{\partial \theta_j}) \\
&= \frac{1}{2} \text{tr}(((K_y^{-1} y)(K_y^{-1} y)^T - K_y^{-1}) \frac{\partial K_y}{\partial \theta_j})
\end{aligned} \tag{3}$$

28 This derivation needs the rules:  $\frac{\partial}{\partial x} A(x)^{-1} = -A(x)^{-1} (\frac{\partial}{\partial x} A(x)) A(x)^{-1}$  and  $\frac{\partial}{\partial x} |A(x)| =$   
29  $|A(x)| \text{tr}(A(x)^{-1} \frac{\partial}{\partial x} A(x))$ . It takes  $O(N^3)$  time to compute  $K_y^{-1}$ , and then  $O(N^2)$  time per hyper-  
30 parameter to compute the gradient. To meet the constraints on the hyper-parameters, such as  $\sigma_y^2 \geq 0$ ,  
31 so we define  $\theta = \log(\sigma_y^2)$ , and then use the chain rule. Given an expression for the log marginal  
32 likelihood and its derivative, we can estimate the kernel parameters using any standard gradient-based  
33 optimizer. However, since the objective is not convex, local minima can be a problem. Alternatively,  
34 we can adopt Hamiltonian Monte Carlo method to sample the hyperparameters.

## 35 4 More experiment results

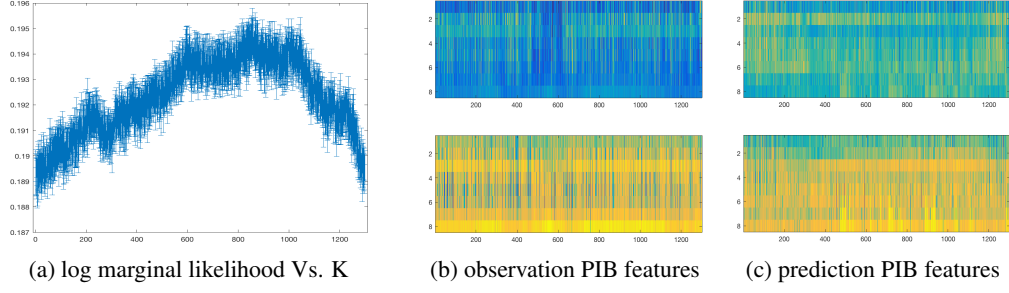

Figure 1: (a) Log marginal likelihoods of the negative iEEG observations without SOZ events with different K. (b) Spectral characteristics of a patient’s positive iEEG observation’s PIB features with SOZ events (top) and negative iEEG observation’s PIB features without SOZ events (bottom). (c) Spectral characteristics of our model’s predictions on the corresponding positive and negative observations averaged over 4000-7000 random samples of 3 Gibbs sampling chains.

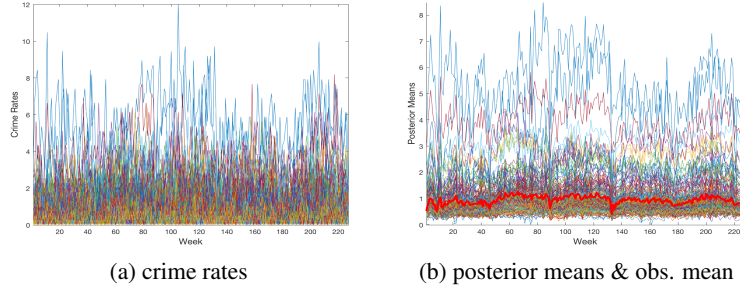

Figure 2: (a) Crime occurrence rates of the 179 CTs in Washington D.C. in 2015-2019. (b) Posterior means of the 179 CTs over time and the empirical mean (red).

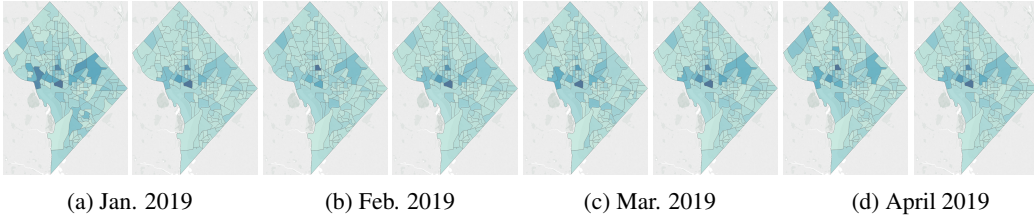

Figure 3: Monthly averaged crime rates maps of the ground truth (left) and the corresponding maps of predictive posterior mean rates  $y_*^{(1:D)}$  using the samples from 4000 to 7000 iterations of the 3 Gibbs sampling chains (right) in 2019.
